# Supplementary material for: Secondary organic aerosol formation and composition from the photo-oxidation of methyl chavicol (estragole)
Source: Copernicus journal article supplement (doi:10.5194/acp-14-5349-2014), 2014-06-03
Supplement: Supplementary file 1 [file acp-14-5349-2014-supplement.pdf]

Supplement of Atmos. Chem. Phys., 14, 5349–5368, 2014  
<http://www.atmos-chem-phys.net/acp-14-5349-2014/>  
doi:10.5194/acp-14-5349-2014-supplement  
© Author(s) 2014. CC Attribution 3.0 License.

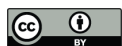

*Supplement of*

## **Secondary organic aerosol formation and composition from the photo-oxidation of methyl chavicol (estragole)**

**K. L. Pereira et al.**

*Correspondence to:* J. F. Hamilton ([jacqui.hamilton@york.ac.uk](mailto:jacqui.hamilton@york.ac.uk))

## Supplementary Information.

**Table S1** – The molecular formulae (MF) and associated errors of the identified SOA compounds in experiment MC<sub>high</sub> using FTICR-MS and HPLC-QTOFMS in negative ionisation mode.

| t <sub>R</sub> | MW<br>[g mol <sup>-1</sup> ] | FTICR-MS<br>MF                                    | Error<br>[ppm] | Score<br>[%] | HPLC-QTOFMS<br>MF                               | Error<br>[ppm] | Score<br>[%] |
|----------------|------------------------------|---------------------------------------------------|----------------|--------------|-------------------------------------------------|----------------|--------------|
| 14.3           | 138                          |                                                   |                |              | C <sub>7</sub> H <sub>6</sub> O <sub>3</sub>    | -9.7           | 100          |
| 30.1           | 152                          | C <sub>8</sub> H <sub>8</sub> O <sub>3</sub> †    | 0.3            | 100          | C <sub>8</sub> H <sub>8</sub> O <sub>3</sub>    | -1.4           | 100          |
| 28.1           | 166                          | C <sub>9</sub> H <sub>10</sub> O <sub>3</sub>     | 0.8            | 100          | C <sub>9</sub> H <sub>10</sub> O <sub>3</sub>   | 1.2            | 100          |
| 33             | 168                          | C <sub>8</sub> H <sub>8</sub> O <sub>4</sub>      | 0.7            | 100          | C <sub>8</sub> H <sub>8</sub> O <sub>4</sub>    | 0.2            | 100          |
| 12.5           | 180                          | C <sub>9</sub> H <sub>8</sub> O <sub>4</sub>      | 0.9            | 100          | C <sub>9</sub> H <sub>8</sub> O <sub>4</sub>    | 2.6            | 100          |
| 16.1           | 182                          | C <sub>9</sub> H <sub>10</sub> O <sub>4</sub>     | 0.8            | 100          | C <sub>9</sub> H <sub>10</sub> O <sub>4</sub>   | -0.3           | 100          |
| 17.6           | 191                          | C <sub>10</sub> H <sub>9</sub> NO <sub>3</sub>    | 0.7            | 100          | C <sub>10</sub> H <sub>9</sub> NO <sub>3</sub>  | -3.2           | 100          |
| 33.7           | 194                          | C <sub>11</sub> H <sub>14</sub> O <sub>3</sub>    | 0              | 100          | C <sub>11</sub> H <sub>14</sub> O <sub>3</sub>  | -0.9           | 0            |
| 25.2           | 196                          | C <sub>10</sub> H <sub>12</sub> O <sub>4</sub>    | 1              | 100          | C <sub>10</sub> H <sub>12</sub> O <sub>4</sub>  | 2.5            | 100          |
| 20.2           | 198                          | C <sub>10</sub> H <sub>14</sub> O <sub>4</sub> †  | 0.9            | 100          | C <sub>10</sub> H <sub>14</sub> O <sub>4</sub>  | 2.4            | 100          |
| 20.7           | 199                          | C <sub>8</sub> H <sub>9</sub> NO <sub>5</sub>     | 0.2            | 100          | C <sub>8</sub> H <sub>9</sub> NO <sub>5</sub>   | -0.2           | 100          |
| 39.6           | 209                          | C <sub>10</sub> H <sub>11</sub> NO <sub>4</sub> † | 0              | 100          | C <sub>10</sub> H <sub>11</sub> NO <sub>4</sub> | 4.3            | 100          |
| 27.8           | 210                          | C <sub>11</sub> H <sub>14</sub> O <sub>4</sub>    | 0.9            | 100          | C <sub>11</sub> H <sub>14</sub> O <sub>4</sub>  | 1.4            | 100          |
| 21.3           | 213                          | C <sub>9</sub> H <sub>11</sub> NO <sub>5</sub>    | 0.7            | 100          | C <sub>9</sub> H <sub>11</sub> NO <sub>5</sub>  | 0.5            | 100          |
| 21             | 214                          | C <sub>11</sub> H <sub>18</sub> O <sub>4</sub>    | 0.4            | 100          | C <sub>11</sub> H <sub>18</sub> O <sub>4</sub>  | 2              | 100          |
| 18.6           | 236                          | C <sub>8</sub> H <sub>12</sub> O <sub>8</sub> †   | 0.5            | 100          | C <sub>8</sub> H <sub>12</sub> O <sub>8</sub>   | 36.6           | 0.13         |
| 31.8           | 238                          | C <sub>12</sub> H <sub>14</sub> O <sub>5</sub>    | 0.9            | 100          | C <sub>12</sub> H <sub>14</sub> O <sub>5</sub>  | 9.9            | 100          |
| 22.2           | 243                          | C <sub>10</sub> H <sub>13</sub> NO <sub>6</sub>   | 0.6            | 100          | C <sub>10</sub> H <sub>13</sub> NO <sub>6</sub> | -0.7           | 100          |
| 35.9           | 252                          | C <sub>13</sub> H <sub>16</sub> O <sub>5</sub>    | 1.6            | 100          | C <sub>13</sub> H <sub>16</sub> O <sub>5</sub>  | 8.1            | 30.3         |
| 12.8           | 277                          | C <sub>9</sub> H <sub>11</sub> NO <sub>9</sub>    | 0.2            | 100          | C <sub>9</sub> H <sub>11</sub> NO <sub>9</sub>  | 0.9            | 100          |
| 28.8           | 292                          | C <sub>15</sub> H <sub>16</sub> O <sub>6</sub>    | 1.2            | 100          |                                                 |                |              |
| 23.3           | 296                          | C <sub>18</sub> H <sub>16</sub> O <sub>4</sub>    | -6.8           | 100          | C <sub>18</sub> H <sub>16</sub> O <sub>4</sub>  | 3.5            | 100          |
| 36.1           | 317                          | C <sub>16</sub> H <sub>15</sub> NO <sub>6</sub>   | -0.3           | 100          | C <sub>16</sub> H <sub>15</sub> NO <sub>6</sub> | 1.8            | 100          |
| 36.2           | 428                          | C <sub>18</sub> H <sub>20</sub> O <sub>12</sub>   | -0.1           | 100          | C <sub>18</sub> H <sub>20</sub> O <sub>12</sub> | -0.8           | 100          |

Error = displayed in ppm and calculated by taking the difference between the exact and measured mass for the assigned molecular formula; dividing the difference by the exact mass and multiplying by  $10^6$ . MF score = the fit of the theoretical and measured isotopic distribution and abundance for the assigned molecular formula (displayed in percent). † Compound observed in both positive and negative ionisation mode.

**Table S2** – The molecular formulae (MF) and associated errors of the identified SOA compounds in experiment MC<sub>high</sub> using FTICR-MS and HPLC-QTOFMS in positive ionisation mode.

| t <sub>R</sub> | MW<br>[g mol <sup>-1</sup> ] | FTICR-MS<br>MF                                   | Error<br>[ppm] | Score<br>[%] | HPLC-QTOFMS<br>MF                                | Error<br>[ppm] | Score<br>[%] |
|----------------|------------------------------|--------------------------------------------------|----------------|--------------|--------------------------------------------------|----------------|--------------|
| 34.3           | 98                           |                                                  |                |              | C <sub>6</sub> H <sub>10</sub> O*                | 18             | 100          |
| 36.4           | 98                           |                                                  |                |              | C <sub>6</sub> H <sub>10</sub> O*                | 14             | 100          |
| 33.7           | 120                          |                                                  |                |              | C <sub>4</sub> H <sub>7</sub> O <sub>4</sub>     | 31.3           | 100          |
| 28.2           | 146                          | C <sub>7</sub> H <sub>14</sub> O <sub>3</sub>    | -1.9           | 100          | C <sub>8</sub> H <sub>12</sub> O*                | 30.1           | 100          |
| 18.5           | 151                          |                                                  |                |              | C <sub>4</sub> H <sub>9</sub> NO <sub>5</sub>    | -21.2          | 100          |
| 30.2           | 152                          | C <sub>8</sub> H <sub>8</sub> O <sub>3</sub> †   | 1.2            | 100          | C <sub>8</sub> H <sub>8</sub> O <sub>3</sub>     | 2.5            | 100          |
| 27.3           | 164                          |                                                  |                |              | C <sub>10</sub> H <sub>12</sub> O <sub>2</sub>   | 16.6           | 100          |
| 12.1           | 168                          | C <sub>9</sub> H <sub>12</sub> O <sub>3</sub> *  | 4.7            | 100          | C <sub>9</sub> H <sub>12</sub> O <sub>3</sub> *  | 12.1           | 100          |
| 27.9           | 170                          | C <sub>8</sub> H <sub>10</sub> O <sub>4</sub> *  | 4.4            | 100          | C <sub>11</sub> H <sub>12</sub> O <sub>3</sub>   | -2.6           | 100          |
| 20.5           | 174                          |                                                  |                |              | C <sub>8</sub> H <sub>14</sub> O <sub>4</sub> *  | -5.5           | 100          |
| 14.5           | 177                          |                                                  |                |              | C <sub>5</sub> H <sub>7</sub> NO <sub>6</sub>    | -26.2          | 100          |
| 22.5           | 180                          | C <sub>10</sub> H <sub>12</sub> O <sub>3</sub> * | 4.3            | 100          | C <sub>10</sub> H <sub>12</sub> O <sub>3</sub> * | 2              | 100          |
| 27.6           | 180                          |                                                  |                |              | C <sub>10</sub> H <sub>12</sub> O <sub>3</sub>   | -7.8           | 100          |
| 36             | 180                          | C <sub>10</sub> H <sub>12</sub> O <sub>3</sub> * | 4.2            | 100          | C <sub>7</sub> H <sub>16</sub> O <sub>5</sub> *  | 2.9            | 100          |
| 33.5           | 182                          | C <sub>10</sub> H <sub>14</sub> O <sub>3</sub> * | 4.4            | 100          | C <sub>10</sub> H <sub>14</sub> O <sub>3</sub> * | -43.3          | 1.2          |
| 10.2           | 184                          |                                                  |                |              | C <sub>8</sub> H <sub>8</sub> O <sub>5</sub>     | 48             | 0            |
| 15.7           | 188                          | C <sub>8</sub> H <sub>12</sub> O <sub>5</sub> *  | 4.6            | 100          | C <sub>8</sub> H <sub>12</sub> O <sub>5</sub> *  | -3.8           | 100          |
| 19             | 190                          | C <sub>8</sub> H <sub>14</sub> O <sub>5</sub> *  | 5.1            | 100          | C <sub>8</sub> H <sub>14</sub> O <sub>5</sub> *  | -0.8           | 100          |
| 41.2           | 192                          | C <sub>9</sub> H <sub>20</sub> O <sub>4</sub> *  | 3.9            | 100          | C <sub>9</sub> H <sub>20</sub> O <sub>4</sub> *  | 37.7           | 100          |

|      |     |                                                   |      |      |                                                  |       |     |
|------|-----|---------------------------------------------------|------|------|--------------------------------------------------|-------|-----|
| 19.8 | 196 | C <sub>10</sub> H <sub>12</sub> O <sub>4</sub> *  | 5    | 100  | C <sub>10</sub> H <sub>12</sub> O <sub>4</sub> * | 9.4   | 100 |
| 10.8 | 198 | C <sub>13</sub> H <sub>10</sub> O <sub>2</sub> *  | 4.2  | 100  | C <sub>13</sub> H <sub>10</sub> O <sub>2</sub> * | -27.8 | 0.3 |
| 14.1 | 198 | C <sub>13</sub> H <sub>10</sub> O <sub>2</sub> *  | 3.9  | 100  | C <sub>13</sub> H <sub>10</sub> O <sub>2</sub> * | 22.9  | 3.1 |
| 16.3 | 198 | C <sub>10</sub> H <sub>14</sub> O <sub>4</sub> *  | 4.2  | 100  | C <sub>10</sub> H <sub>14</sub> O <sub>4</sub> * | 24    | 100 |
| 20.2 | 198 | C <sub>10</sub> H <sub>14</sub> O <sub>4</sub> *† | 4.2  | 90.1 | C <sub>10</sub> H <sub>14</sub> O <sub>4</sub> * | 1.3   | 100 |
| 14.8 | 204 | C <sub>12</sub> H <sub>12</sub> O <sub>3</sub> *  | 16   | 100  |                                                  |       |     |
| 39.7 | 209 | C <sub>10</sub> H <sub>11</sub> NO <sub>4</sub> † | 0.9  | 100  | C <sub>10</sub> H <sub>11</sub> NO <sub>4</sub>  | 6.9   | 100 |
| 33   | 212 | C <sub>11</sub> H <sub>16</sub> O <sub>4</sub> *  | 5.1  | 100  | C <sub>10</sub> H <sub>18</sub> O <sub>6</sub>   | 23.4  | 0.5 |
| 21.4 | 214 | C <sub>11</sub> H <sub>18</sub> O <sub>4</sub> *  | 5    | 100  |                                                  |       |     |
| 20.9 | 226 | C <sub>12</sub> H <sub>18</sub> O <sub>4</sub> *  | 5.4  | 100  | C <sub>12</sub> H <sub>18</sub> O <sub>4</sub> * | 48    | 0   |
| 30.4 | 232 | C <sub>10</sub> H <sub>16</sub> O <sub>6</sub>    | 5.3  | 100  | C <sub>10</sub> H <sub>16</sub> O <sub>6</sub>   | -10.7 | 100 |
| 18.8 | 237 | C <sub>8</sub> H <sub>12</sub> O <sub>8</sub> †   | -2.9 | 100  | C <sub>8</sub> H <sub>12</sub> O <sub>8</sub>    | 5.5   | 100 |
| 33.8 | 238 | C <sub>13</sub> H <sub>18</sub> O <sub>4</sub> *  | 5.4  | 100  | C <sub>13</sub> H <sub>18</sub> O <sub>4</sub> * | 33.1  | 0   |
| 41.5 | 240 | C <sub>9</sub> H <sub>14</sub> O <sub>6</sub> *   | 5    | 100  | C <sub>9</sub> H <sub>20</sub> O <sub>7</sub>    | -1.9  | 0   |
| 17.1 | 244 | C <sub>11</sub> H <sub>16</sub> O <sub>6</sub> *  | 5.6  | 100  |                                                  |       |     |
| 47.4 | 248 | C <sub>12</sub> H <sub>24</sub> O <sub>5</sub> *  | 4.7  | 100  | C <sub>12</sub> H <sub>24</sub> O <sub>5</sub> * | 43.2  | 0   |
| 37.7 | 250 | C <sub>11</sub> H <sub>22</sub> O <sub>6</sub> *  | 6.2  | 100  | C <sub>11</sub> H <sub>22</sub> O <sub>6</sub> * | -17.4 | 4.1 |
| 43.2 | 256 | C <sub>14</sub> H <sub>24</sub> O <sub>4</sub> *  | -3.3 | 100  | C <sub>14</sub> H <sub>24</sub> O <sub>4</sub> * | 6.6   | 100 |
| 8.9  | 286 | C <sub>19</sub> H <sub>10</sub> O <sub>3</sub>    | 5.2  | 100  | C <sub>19</sub> H <sub>10</sub> O <sub>3</sub>   | 43.7  | 0   |
| 44   | 302 | C <sub>16</sub> H <sub>30</sub> O <sub>5</sub> *  | 6.2  | 100  | C <sub>16</sub> H <sub>30</sub> O <sub>5</sub> * | 8     | 92  |

\* Identified as [M+Na]<sup>+</sup>, the Na adduct has been removed from molecular formula and the molecular weight corrected. Error = displayed in ppm and calculated by taking the difference between the exact and measured mass for the assigned molecular formula; dividing the difference by the exact mass and multiplying by 10<sup>6</sup>. MF score = the fit of the theoretical and measured isotopic distribution and abundance for the assigned molecular formula (displayed in percent). † Compound observed in both positive and negative ionisation mode.

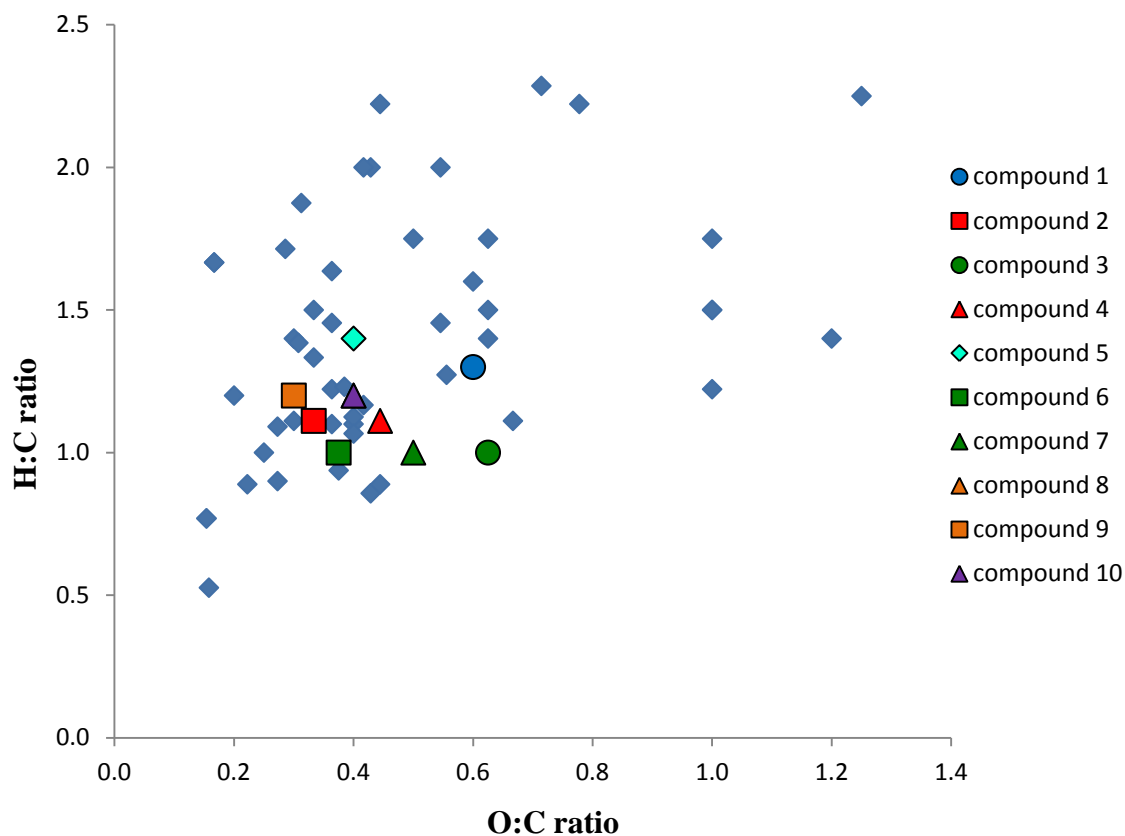

**SI Figure 1** – Van Krevelen plot of the 59 SOA compounds observed in  $MC_{high}$ . Blue diamond's represent structurally unidentified compounds. Legend shows the structurally identified compounds 1 to 10, refer to Table 2 for compound identification. For the structurally identified compounds only; related generations of compounds are shown in the same colour. The change of shape but use of the same colour indicates a change in the SOA compound structure through the reaction with  $\cdot OH$  radicals or  $NO_2$ . Compounds 8 and 10 are structural isomers; compound 8 is hidden by compound 10.

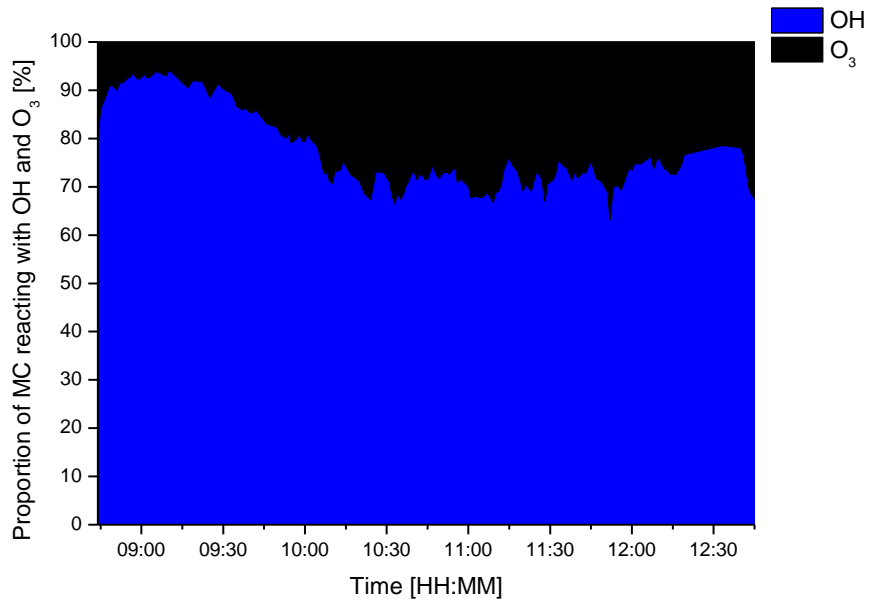

**SI Figure 2** – Proportion of methyl chavicol (MC) reacting with  $\cdot\text{OH}$  and  $\text{O}_3$  at each measured time point during  $\text{MC}_{\text{high}}$ . The proportion of methyl chavicol reacting with  $\cdot\text{OH}$  and  $\text{O}_3$  was calculated using Eq.1 and Eq.2, respectively.

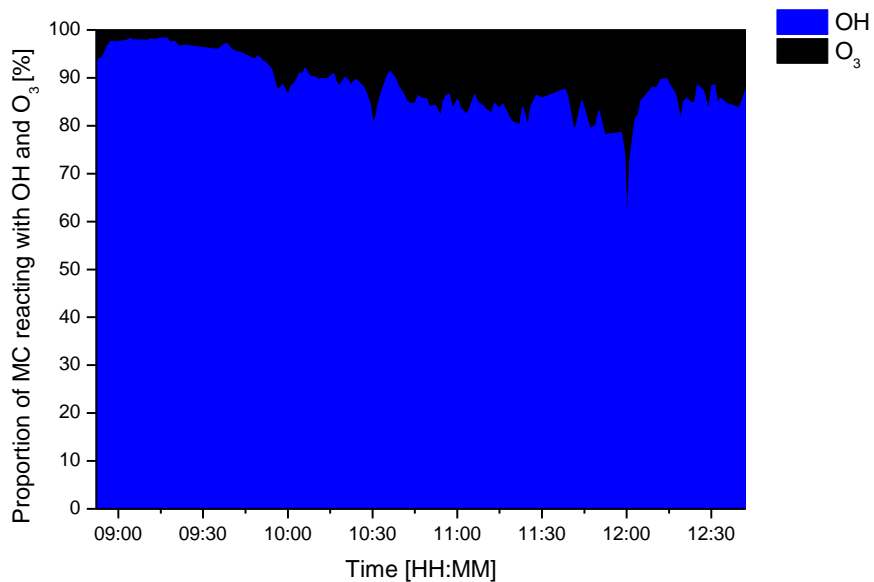

**SI Figure 3** – Proportion of methyl chavicol (MC) reacting with  $\cdot\text{OH}$  and  $\text{O}_3$  at each measured time point during  $\text{MC}_{\text{low}}$ . The proportion of methyl chavicol reacting with  $\cdot\text{OH}$  and  $\text{O}_3$  was calculated using Eq.1 and Eq.2, respectively.

**Eq.1** 
$$\% OH = \left( \frac{k_{MC+OH}[OH]}{(k_{MC+OH}[OH] + k_{MC+O_3}[O_3])} \right) \times 100$$

**Eq.2** 
$$\% O_3 = \left( \frac{k_{MC+O_3}[O_3]}{(k_{MC+O_3}[O_3] + k_{MC+OH}[OH])} \right) \times 100$$

$k_{MC+OH}$  = rate constant of the reaction of methyl chavicol with OH ( $\text{cm}^3 \text{ molecule}^{-1} \text{ s}^{-1}$ )

$k_{MC+O_3}$  = rate constant of the reaction of methyl chavicol with  $O_3$  ( $\text{cm}^3 \text{ molecule}^{-1} \text{ s}^{-1}$ )

[OH] = concentration of OH (ppbv)

[ $O_3$ ] = concentration of  $O_3$  (ppbv)
